# Supplementary material for: Different delocalized ranges in mixed valence cyanido–metal-bridged Fe–Ru–Fe complexes controlled by terminal ligand substitution modification
Source: Royal Society of Chemistry journal article supplement (doi:10.1039/d3dt02208k), 2023-01-01
Supplement: d3dt02208k1.pdf [file d3dt02208k1.pdf]

# Dalton Transaction

## Supporting Information

### **Different delocalized range in mixed valence cyanidometal-bridged Fe-Ru-Fe complexes controlled by terminal ligand substitution modification**

Chen Zeng,<sup>a,b</sup> Qing-Dou Xu,<sup>a</sup> Xiao-Lin Liu,<sup>a,b</sup> Sheng-Min Hu,<sup>a</sup> Xin-Tao Wu<sup>a</sup> and Tian-Lu Sheng<sup>\*a</sup>

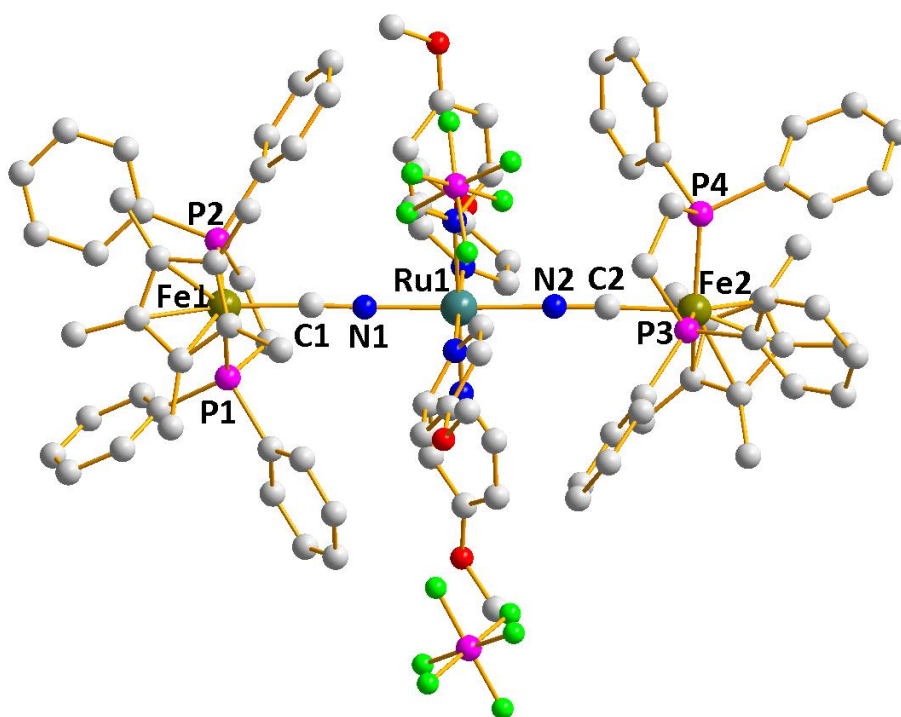

**Fig. S1** Molecular structure of  $2[\text{PF}_6]_2$  (hydrogen atoms and solvent molecules have been removed for clarity). Ru, teal; Fe, dark yellow; C, gray; N, blue; P, pink; F, bright green.

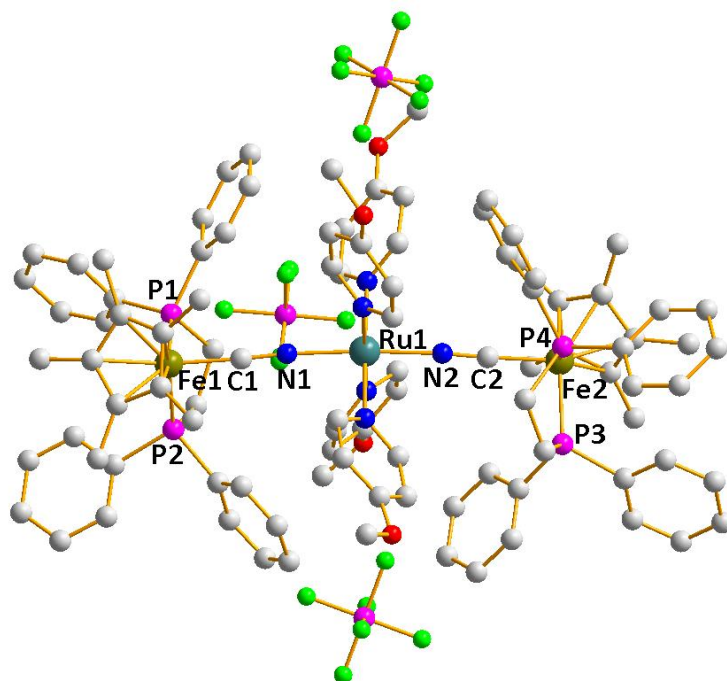

**Fig. S2** Molecular structure of  $2[\text{PF}_6]_3$  (hydrogen atoms and solvent molecules have been removed for clarity). Ru, teal; Fe, dark yellow; C, gray; N, blue; P, pink; F, bright green.

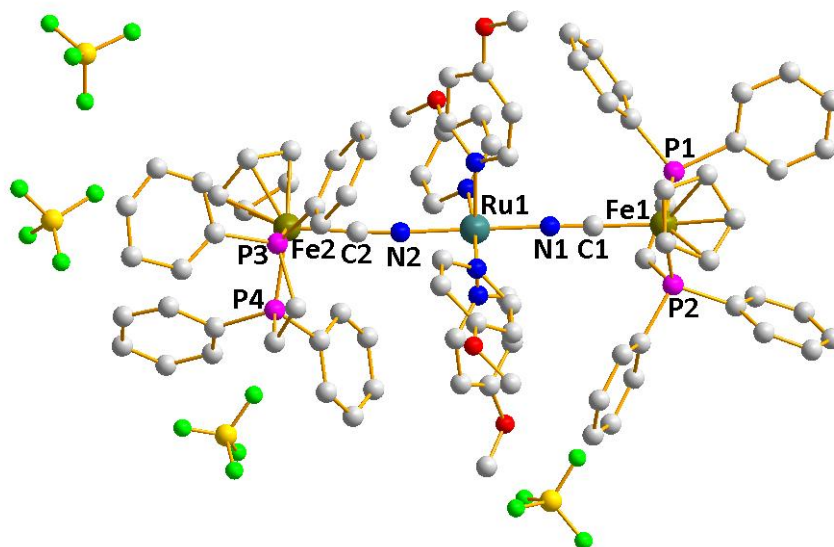

**Fig. S3** Molecular structure of  $2[\text{BF}_4]_4$  (hydrogen atoms and solvent molecules have been removed for clarity). Ru, teal; Fe, dark yellow; C, gray; N, blue; P, pink; B, yellow; F, bright green.

**Table S1.** Selected bond lengths (Å), the distance between the metal centers (Å) and bond angle ( $^\circ$ ) of  $1^{n+}$  ( $n = 2, 3, 4$ ).

|           | $1^{2+}$ | $1^{2+}$ average | $1^{3+}$   | $1^{3+}$ average | $1^{4+}$   | $1^{4+}$ average |
|-----------|----------|------------------|------------|------------------|------------|------------------|
| Ru1-N1    | 2.055(5) | 2.055(5)         | 1.991(3)   | 1.994(3)         | 2.002(4)   | 1.995(4)         |
| Ru1-N2    |          |                  | 1.996(3)   | 1.994(3)         | 1.987(4)   | 1.995(4)         |
| C1≡N1     | 1.166(7) | 1.166(7)         | 1.162(4)   | 1.165(4)         | 1.157(6)   | 1.157(6)         |
| C2≡N2     |          |                  | 1.167(5)   | 1.165(4)         | 1.157(6)   | 1.157(6)         |
| Fe1-C1    | 1.893(6) | 1.893(6)         | 1.841(3)   | 1.843(3)         | 1.900(5)   | 1.896(5)         |
| Fe2-C2    |          |                  | 1.844(3)   | 1.843(3)         | 1.891(5)   | 1.896(5)         |
| Fe1-P1    | 2.189(2) |                  | 2.1926(10) | 2.198(1)         | 2.2460(15) | 2.244(1)         |
| Fe1-P2    | 2.185(2) | 2.187(2)         | 2.2034(10) | 2.198(1)         | 2.2431(14) | 2.244(1)         |
| Fe2-P3    | 2.189(2) |                  | 2.2047(10) | 2.197(1)         | 2.2265(16) | 2.237(2)         |
| Fe2-P4    | 2.185(2) |                  | 2.1899(10) | 2.197(1)         | 2.2471(18) | 2.237(2)         |
| Ru1...Fe1 | 5.077    | 5.077            | 4.982      | 4.990            | 5.048      | 5.033            |
| Ru1...Fe2 |          |                  | 4.998      | 4.990            | 5.018      | 5.033            |
| Ru1-N1-C1 | 171.9(5) | 171.9(5)         | 172.9(3)   | 173.6            | 173.8(4)   | 173.4(4)         |
| Ru1-N2-C2 |          |                  | 174.3(3)   | 173.6            | 173.1(4)   | 173.4(4)         |
| Fe1-C1-N1 | 172.5(5) | 172.5(5)         | 175.7(3)   | 175.4            | 177.7(4)   | 176.8(5)         |
| Fe2-C2-N2 |          |                  | 175.2(3)   | 175.4            | 175.9(5)   | 176.8(5)         |
| N1-Ru1-N2 | 180.0    | --               | 177.69(12) | --               | 179.43(16) | --               |

**Table S2.** Selected bond lengths (Å), the distance between the metal centers (Å) and bond angle ( $^\circ$ ) of  $2^{n+}$  ( $n = 2, 3, 4$ ).

|        | $2^{2+}$ | $2^{2+}$ average | $2^{3+}$ | $2^{3+}$ average | $2^{4+}$ | $2^{4+}$ average |
|--------|----------|------------------|----------|------------------|----------|------------------|
| Ru1-N1 | 2.062(3) | 2.073(3)         | 2.024(5) | 2.024(5)         | 2.022(6) | 2.020(6)         |
| Ru1-N2 | 2.084(3) | 2.073(3)         | 2.008(5) | 2.008(5)         | 2.018(6) | 2.020(6)         |
| C1≡N1  | 1.163(4) | 1.158(3)         | 1.190(8) | 1.185            | 1.156(9) | 1.158(3)         |

|           |            |          |            |          |          |
|-----------|------------|----------|------------|----------|----------|
| C2≡N2     | 1.152(4)   |          | 1.180(8)   |          | 1.143(9) |
| Fe1-C1    | 1.904(3)   | 1.903(3) | 1.873(6)   |          | 1.934(7) |
| Fe2-C2    | 1.903(3)   |          | 1.875(6)   |          | 1.926(7) |
| Fe1-P1    | 2.2202(10) |          | 2.2270(19) | 2.218(2) | 2.298(2) |
| Fe1-P2    | 2.2164(10) | 2.214(1) | 2.2090(19) |          | 2.296(2) |
| Fe2-P3    | 2.2120(11) |          | 2.2352(19) | 2.242(2) | 2.312(2) |
| Fe2-P4    | 2.2070(10) |          | 2.2481(18) |          | 2.276(2) |
| Ru1---Fe1 | 5.126      |          | 5.085      |          | 5.108    |
| Ru1---Fe2 | 5.137      | 5.132    | 5.058      |          | 5.085    |
| Ru1-N1-C1 | 177.2(3)   | 177.8(3) | 175.3(5)   |          | 176.0(6) |
| Ru1-N2-C2 | 178.4(3)   |          | 175.0(5)   |          | 176.8(6) |
| Fe1-C1-N1 | 176.4(3)   |          | 177.3(6)   |          | 176.9(7) |
| Fe2-C2-N2 | 177.9(3)   | 177.2(3) | 177.8(6)   |          | 177.4(7) |
| N1-Ru1-N2 | 178.81(11) |          | 176.5(2)   |          | 176.8(2) |

**Table S3.** Crystallographic data for **1[X]<sub>n</sub>** (**X = PF<sub>6</sub> or BF<sub>4</sub>, n = 2, 3, 4**).

|                                            | <b>1[PF<sub>6</sub>]<sub>2</sub></b>                                                                            | <b>1[BF<sub>4</sub>]<sub>3</sub></b>                                                                                            | <b>1[BF<sub>4</sub>]<sub>4</sub></b>                                                                                           |
|--------------------------------------------|-----------------------------------------------------------------------------------------------------------------|---------------------------------------------------------------------------------------------------------------------------------|--------------------------------------------------------------------------------------------------------------------------------|
| <b>Empirical formula</b>                   | C <sub>88</sub> H <sub>86</sub> F <sub>12</sub> Fe <sub>2</sub> N <sub>6</sub> O <sub>4</sub> P <sub>6</sub> Ru | C <sub>96</sub> H <sub>98</sub> B <sub>3</sub> F <sub>12</sub> Fe <sub>2</sub> N <sub>10</sub> O <sub>4</sub> P <sub>4</sub> Ru | C <sub>92</sub> H <sub>92</sub> B <sub>4</sub> F <sub>16</sub> Fe <sub>2</sub> N <sub>8</sub> O <sub>4</sub> P <sub>4</sub> Ru |
| <b>Formula weight</b>                      | 1918.21                                                                                                         | 2052.92                                                                                                                         | 2057.62                                                                                                                        |
| <b>Crystal size (mm)</b>                   | 0.200 × 0.100 × 0.100                                                                                           | 0.084 × 0.037 × 0.019                                                                                                           | 0.100 × 0.100 × 0.100                                                                                                          |
| <b>Temperature/K</b>                       | 293(2)                                                                                                          | 99.98(13)                                                                                                                       | 100.15                                                                                                                         |
| <b>Crystal system</b>                      | triclinic                                                                                                       | monoclinic                                                                                                                      | triclinic                                                                                                                      |
| <b>Space group</b>                         | P $\bar{1}$                                                                                                     | P2 <sub>1</sub> /n                                                                                                              | P $\bar{1}$                                                                                                                    |
| <b>a/Å</b>                                 | 11.366(4)                                                                                                       | 15.4029(2)                                                                                                                      | 14.2053(3)                                                                                                                     |
| <b>b/Å</b>                                 | 13.418(6)                                                                                                       | 36.5766(4)                                                                                                                      | 15.3072(3)                                                                                                                     |
| <b>c/Å</b>                                 | 15.982(6)                                                                                                       | 17.9000(2)                                                                                                                      | 23.6959(6)                                                                                                                     |
| <b>α/°</b>                                 | 89.65(3)                                                                                                        | 90                                                                                                                              | 82.436(2)                                                                                                                      |
| <b>β/°</b>                                 | 71.93(2)                                                                                                        | 108.3240(10)                                                                                                                    | 78.481(2)                                                                                                                      |
| <b>γ/°</b>                                 | 67.437(16)                                                                                                      | 90                                                                                                                              | 76.674(2)                                                                                                                      |
| <b>Volume/Å<sup>3</sup></b>                | 2122.1(15)                                                                                                      | 9573.3(2)                                                                                                                       | 4893.0(2)                                                                                                                      |
| <b>Z</b>                                   | 1                                                                                                               | 4                                                                                                                               | 2                                                                                                                              |
| <b>ρ<sub>calcd</sub>/g cm<sup>-3</sup></b> | 1.499                                                                                                           | 1.424                                                                                                                           | 1.397                                                                                                                          |
| <b>μ/mm<sup>-1</sup></b>                   | 0.707                                                                                                           | 3.293                                                                                                                           | 3.320                                                                                                                          |
| <b>F(000)</b>                              | 980.0                                                                                                           | 4220.0                                                                                                                          | 2104.0                                                                                                                         |
| <b>λ (Å)</b>                               | MoK $\alpha$ (λ = 0.71073)                                                                                      | GaK $\alpha$ (λ = 1.3405)                                                                                                       | GaK $\alpha$ (λ = 1.3405)                                                                                                      |
| <b>2θ range/°</b>                          | 4.378 - 49.994                                                                                                  | 4.2 - 120.32                                                                                                                    | 5.18 - 105.862                                                                                                                 |
| <b>Index range</b>                         | -13 ≤ h ≤ 13                                                                                                    | -19 ≤ h ≤ 18                                                                                                                    | -16 ≤ h ≤ 16                                                                                                                   |
|                                            | -15 ≤ k ≤ 15                                                                                                    | -47 ≤ k ≤ 40                                                                                                                    | -18 ≤ k ≤ 18                                                                                                                   |
|                                            | -18 ≤ l ≤ 19                                                                                                    | -21 ≤ l ≤ 23                                                                                                                    | -27 ≤ l ≤ 28                                                                                                                   |
| <b>Reflections collected</b>               | 18534                                                                                                           | 73200                                                                                                                           | 45646                                                                                                                          |
| <b>Independent reflections</b>             | 7420 (R <sub>int</sub> = 0.0422,<br>R <sub>sigma</sub> = 0.0602)                                                | 21201 (R <sub>int</sub> = 0.0762,<br>R <sub>sigma</sub> = 0.0608)                                                               | 16470 (R <sub>int</sub> = 0.0606,<br>R <sub>sigma</sub> = 0.0685)                                                              |
| <b>Data/restraints/parameters</b>          | 7420/0/547                                                                                                      | 21201/0/1197                                                                                                                    | 16470/54/1174                                                                                                                  |
| <b>Goodness-of-fit on F<sup>2</sup></b>    | 1.142                                                                                                           | 1.027                                                                                                                           | 1.082                                                                                                                          |

|                             |                |                |                |
|-----------------------------|----------------|----------------|----------------|
| <b>R1, wR2 (I ≥ 2σ (I))</b> | 0.0771, 0.1367 | 0.0642, 0.1662 | 0.0692, 0.1848 |
| <b>R1, wR2 (all data)</b>   | 0.0960, 0.1544 | 0.0754, 0.1731 | 0.0909, 0.2045 |

**Table S4.** Crystallographic data for **2[X]<sub>n</sub>** (**X = PF<sub>6</sub> or BF<sub>4</sub>, n = 2, 3, 4**).

|                                            | <b>2[PF<sub>6</sub>]<sub>2</sub></b>                                                                                            | <b>2[PF<sub>6</sub>]<sub>3</sub></b>                                                                                             | <b>2[BF<sub>4</sub>]<sub>4</sub></b>                                                                                                           |
|--------------------------------------------|---------------------------------------------------------------------------------------------------------------------------------|----------------------------------------------------------------------------------------------------------------------------------|------------------------------------------------------------------------------------------------------------------------------------------------|
| <b>Empirical formula</b>                   | C <sub>99</sub> H <sub>108</sub> Cl <sub>2</sub> F <sub>12</sub> Fe <sub>2</sub> N <sub>6</sub> O <sub>4</sub> P <sub>6</sub> R | C <sub>105</sub> H <sub>122</sub> Cl <sub>6</sub> F <sub>18</sub> Fe <sub>2</sub> N <sub>8</sub> O <sub>5</sub> P <sub>7</sub> R | C <sub>99</sub> H <sub>108</sub> B <sub>4</sub> Cl <sub>2</sub> F <sub>16</sub> Fe <sub>2</sub> N <sub>6</sub> O <sub>4</sub> P <sub>4</sub> R |
|                                            | u                                                                                                                               | u                                                                                                                                | u                                                                                                                                              |
| <b>Formula weight</b>                      | 2143.40                                                                                                                         | 2532.34                                                                                                                          | 2200.70                                                                                                                                        |
| <b>Crystal size (mm)</b>                   | 0.200 × 0.200 × 0.200                                                                                                           | 0.213 × 0.174 × 0.151                                                                                                            | 0.053 × 0.041 × 0.027                                                                                                                          |
| <b>Temperature/K</b>                       | 293(2)                                                                                                                          | 293(2)                                                                                                                           | 99.9(3)                                                                                                                                        |
| <b>Crystal system</b>                      | monoclinic                                                                                                                      | monoclinic                                                                                                                       | triclinic                                                                                                                                      |
| <b>Space group</b>                         | P2 <sub>1</sub> /c                                                                                                              | C2/c                                                                                                                             | Pī                                                                                                                                             |
| <b>a/Å</b>                                 | 13.7860(2)                                                                                                                      | 29.9516(8)                                                                                                                       | 12.8285(2)                                                                                                                                     |
| <b>b/Å</b>                                 | 32.4422(4)                                                                                                                      | 26.1705(4)                                                                                                                       | 15.42782(19)                                                                                                                                   |
| <b>c/Å</b>                                 | 25.3027(4)                                                                                                                      | 31.3955(8)                                                                                                                       | 28.5354(3)                                                                                                                                     |
| <b>α/°</b>                                 | 90                                                                                                                              | 90                                                                                                                               | 96.4022(9)                                                                                                                                     |
| <b>β/°</b>                                 | 100.979(2)                                                                                                                      | 116.090(3)                                                                                                                       | 101.3199(12)                                                                                                                                   |
| <b>γ/°</b>                                 | 90                                                                                                                              | 90                                                                                                                               | 91.2395(12)                                                                                                                                    |
| <b>Volume/Å<sup>3</sup></b>                | 11109.5(3)                                                                                                                      | 22101.7(10)                                                                                                                      | 5497.70(13)                                                                                                                                    |
| <b>Z</b>                                   | 4                                                                                                                               | 8                                                                                                                                | 2                                                                                                                                              |
| <b>ρ<sub>calcd</sub>/g cm<sup>-3</sup></b> | 1.282                                                                                                                           | 1.522                                                                                                                            | 1.329                                                                                                                                          |
| <b>μ/mm<sup>-1</sup></b>                   | 3.300                                                                                                                           | 4.106                                                                                                                            | 3.270                                                                                                                                          |
| <b>F(000)</b>                              | 4416.0                                                                                                                          | 10392.0                                                                                                                          | 2260.0                                                                                                                                         |
| <b>λ (Å)</b>                               | Ga <sub>Kα</sub> (λ = 1.3405)                                                                                                   | Ga <sub>Kα</sub> (λ = 1.3405)                                                                                                    | Ga <sub>Kα</sub> (λ = 1.3405)                                                                                                                  |
| <b>2θ range/°</b>                          | 3.896 - 105.862                                                                                                                 | 4.166 - 105.862                                                                                                                  | 5.016 - 105.862                                                                                                                                |
|                                            | -15 ≤ h ≤ 16                                                                                                                    | -35 ≤ h ≤ 35                                                                                                                     | -15 ≤ h ≤ 15                                                                                                                                   |
| <b>Index range</b>                         | -25 ≤ k ≤ 38                                                                                                                    | -29 ≤ k ≤ 31                                                                                                                     | -17 ≤ k ≤ 18                                                                                                                                   |
|                                            | -28 ≤ l ≤ 30                                                                                                                    | -37 ≤ l ≤ 37                                                                                                                     | -32 ≤ l ≤ 33                                                                                                                                   |
| <b>Reflections collected</b>               | 79138                                                                                                                           | 103307                                                                                                                           | 62367                                                                                                                                          |
| <b>Independent reflections</b>             | 19597 (R <sub>int</sub> = 0.0410,<br>R <sub>sigma</sub> = 0.0367)                                                               | 10493 (R <sub>int</sub> = 0.0599,<br>R <sub>sigma</sub> = 0.0342)                                                                | 19396 (R <sub>int</sub> = 0.0928,<br>R <sub>sigma</sub> = 0.0810)                                                                              |
| <b>Data/restraints/parameter<br/>s</b>     | 19597/0/1203                                                                                                                    | 19493/0/1368                                                                                                                     | 19396/12/1254                                                                                                                                  |
| <b>Goodness-of-fit on F<sup>2</sup></b>    | 1.047                                                                                                                           | 1.073                                                                                                                            | 1.031                                                                                                                                          |
| <b>R1, wR2 (I ≥ 2σ (I))</b>                | 0.0538, 0.1558                                                                                                                  | 0.0889, 0.2397                                                                                                                   | 0.1104, 0.2919                                                                                                                                 |
| <b>R1, wR2 (all data)</b>                  | 0.0648, 0.1624                                                                                                                  | 0.0940, 0.2430                                                                                                                   | 0.1232, 0.3020                                                                                                                                 |

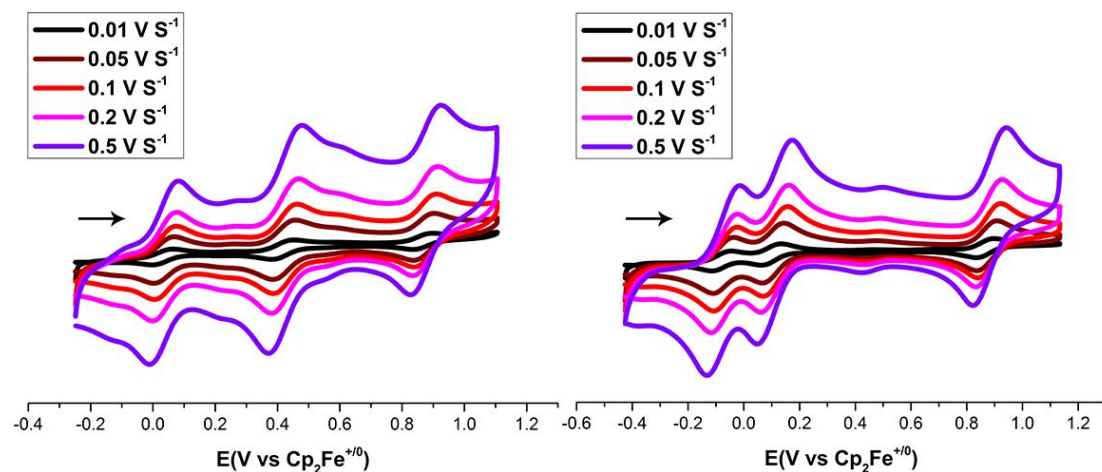

**Fig S4.** Cyclic voltammograms of **1[PF<sub>6</sub>]<sub>2</sub>** (left), and **2[PF<sub>6</sub>]<sub>2</sub>** (right) in a 0.1 M chloroform solution of Bu<sub>4</sub>NPF<sub>6</sub> at a scan rate from 0.01 to 0.5 V s<sup>-1</sup> at room temperature. Init E (**1[PF<sub>6</sub>]<sub>2</sub>**) = -0.248 V vs Ag/AgCl; Init E (**2[PF<sub>6</sub>]<sub>2</sub>**) = -0.425V.

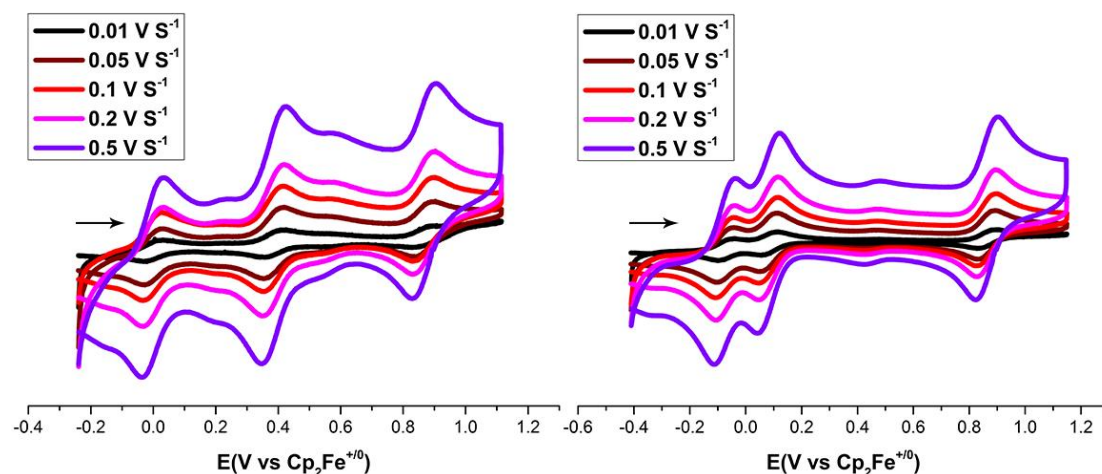

**Fig S5.** Cyclic voltammograms of **1[PF<sub>6</sub>]<sub>2</sub>** (left), and **2[PF<sub>6</sub>]<sub>2</sub>** (right) in a 0.1 M acetonitrile solution of Bu<sub>4</sub>NPF<sub>6</sub> at a scan rate from 0.01 to 0.5 V s<sup>-1</sup> at room temperature. Init E (**1[PF<sub>6</sub>]<sub>2</sub>**) = -0.239 V; Init E (**2[PF<sub>6</sub>]<sub>2</sub>**) = -0.409 V.

**Table S5.** Half-wave potentials ( $E_{1/2}$  vs Fc/Fc<sup>+</sup>) and difference between the redox process ( $\Delta E$ ) of **1[PF<sub>6</sub>]<sub>2</sub>** and **2[PF<sub>6</sub>]<sub>2</sub>** from cyclic voltammetry at a scan rate of 0.1 V s<sup>-1</sup> in acetonitrile.

|                                      | $E_{1/2}(1)/V$ | $E_{1/2}(2)/V$ | $E_{1/2}(3)/V$ | $\Delta E_{1/2}(1)/V$ | $\Delta E_{1/2}(2)/V$ |
|--------------------------------------|----------------|----------------|----------------|-----------------------|-----------------------|
| <b>1[PF<sub>6</sub>]<sub>2</sub></b> | -0.004         | 0.384          | 0.865          | 0.392                 | 0.481                 |
| <b>2[PF<sub>6</sub>]<sub>2</sub></b> | -0.076         | 0.080          | 0.861          | 0.156                 | 0.781                 |

**Table S6.** Half-wave potentials ( $E_{1/2}$  vs Fc/Fc<sup>+</sup>), and electron counts ( $n$ ) of **1[PF<sub>6</sub>]<sub>2</sub>** and **2[PF<sub>6</sub>]<sub>2</sub>** from cyclic voltammetry at a scan rate of 0.01 V s<sup>-1</sup> in dichloromethane.

|                                      | $E_{1/2}(1)/V$ | $n$  | $E_{1/2}(2)/V$ | $n$  | $E_{1/2}(3)/V$ | $n$  |
|--------------------------------------|----------------|------|----------------|------|----------------|------|
| <b>1[PF<sub>6</sub>]<sub>2</sub></b> | 0.031          | 1.07 | 0.416          | 1.28 | 0.866          | 0.95 |
| <b>2[PF<sub>6</sub>]<sub>2</sub></b> | -0.080         | 1.15 | 0.098          | 1.15 | 0.866          | 1.05 |

**Table S7.** Half-wave potentials ( $E_{1/2}$  vs Fc/Fc<sup>+</sup>), and electron counts (n) of **1**[PF<sub>6</sub>]<sub>2</sub> and **2**[PF<sub>6</sub>]<sub>2</sub> from cyclic voltammetry at a scan rate of 0.01 V s<sup>-1</sup> in acetonitrile.

|                                          | $E_{1/2}(1)/V$ | n    | $E_{1/2}(2)/V$ | n    | $E_{1/2}(3)/V$ | n    |
|------------------------------------------|----------------|------|----------------|------|----------------|------|
| <b>1</b> [PF <sub>6</sub> ] <sub>2</sub> | -0.002         | 1.00 | 0.384          | 0.95 | 0.866          | 0.83 |
| <b>2</b> [PF <sub>6</sub> ] <sub>2</sub> | -0.027         | 0.92 | 0.086          | 0.92 | 0.864          | 1.03 |

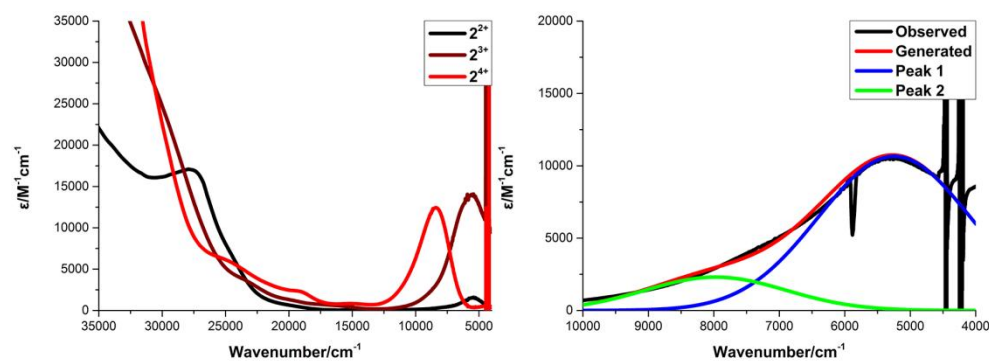

**Fig. S6** The Gaussian peak fitting of the UV-Vis-NIR spectra of **2**<sup>3+</sup> in dichloromethane at room temperature.

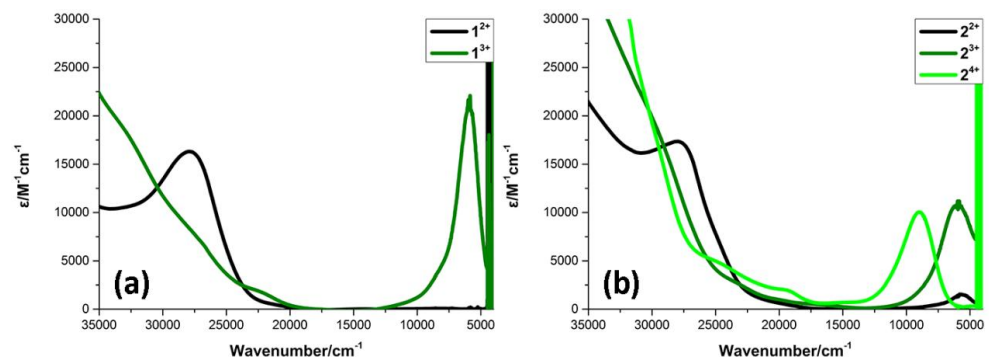

**Fig. S7** The UV-vis-NIR spectroscopy of (a) **1**<sup>n+</sup> and (b) **2**<sup>n+</sup> (n = 2, black; n = 3, olive; n = 4, green) in acetonitrile at room temperature. The UV-vis-NIR spectroscopy of **1**<sup>4+</sup> in acetonitrile could not be obtained since it gets reduced into **1**<sup>3+</sup> immediately when dissolves.

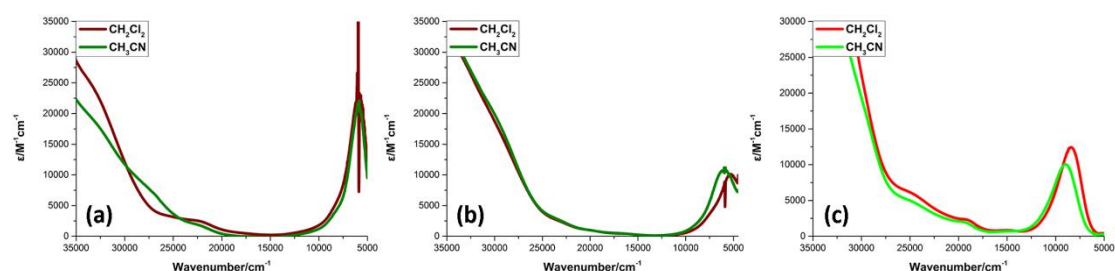

**Fig. S8** UV-Vis-NIR spectra of (a) **1**<sup>3+</sup>, (b) **2**<sup>3+</sup> and (c) **2**<sup>4+</sup> in different solvents

**Table S8.** The UV-vis-NIR absorption (cm<sup>-1</sup>) of **N**<sup>n+</sup> (N = 1, 2; n = 3, 4) in acetonitrile at room temperature.

| <b>N</b> <sup>3+</sup> | $\lambda_{\max}(\text{exp})/\text{cm}^{-1}$ ( $\epsilon/\text{M}^{-1}\text{cm}^{-1}$ ) | <b>N</b> <sup>4+</sup> | $\lambda_{\max}(\text{exp})/\text{cm}^{-1}$ ( $\epsilon/\text{M}^{-1}\text{cm}^{-1}$ ) |
|------------------------|----------------------------------------------------------------------------------------|------------------------|----------------------------------------------------------------------------------------|
| <b>1</b> <sup>3+</sup> | 5872 (20939)                                                                           | <b>1</b> <sup>4+</sup> | _[a]                                                                                   |
| <b>2</b> <sup>3+</sup> | 5930 (10709)                                                                           | <b>2</b> <sup>4+</sup> | 9004 (10012)                                                                           |

[a] The data could not be obtained because **1**<sup>4+</sup> turns extremely fast into **1**<sup>3+</sup> when dissolves in acetonitrile.

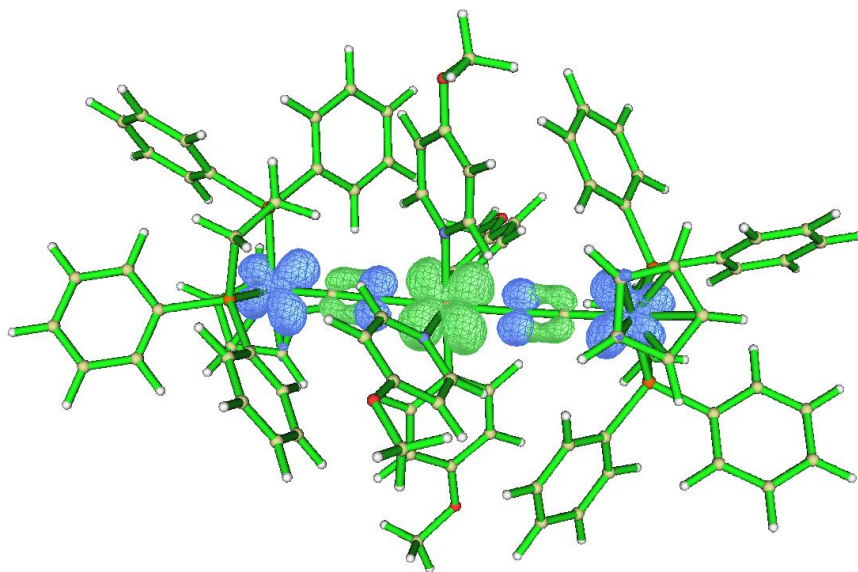

**Fig. S9.** Redistribution of the electron density for the electronic transition of  $1^{3+}$  in the calculated 1655 nm transition band. The green and blues areas represent gain and losses of density. The isosurface value is -0.0004 au.

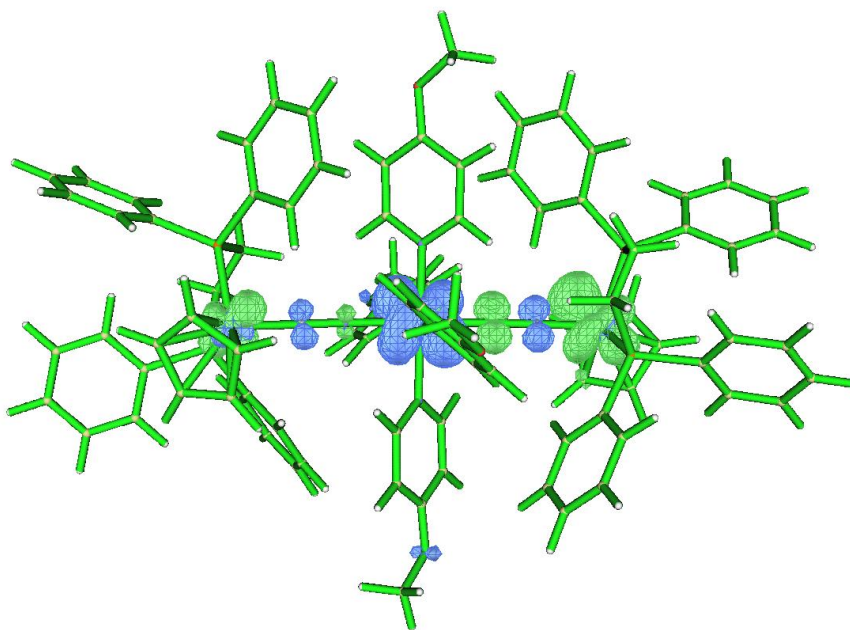

**Fig. S10.** Redistribution of the electron density for the electronic transition of  $1^{4+}$  in the calculated 950 nm transition band. The green and blues areas represent gain and losses of density. The isosurface value is -0.0004 au.



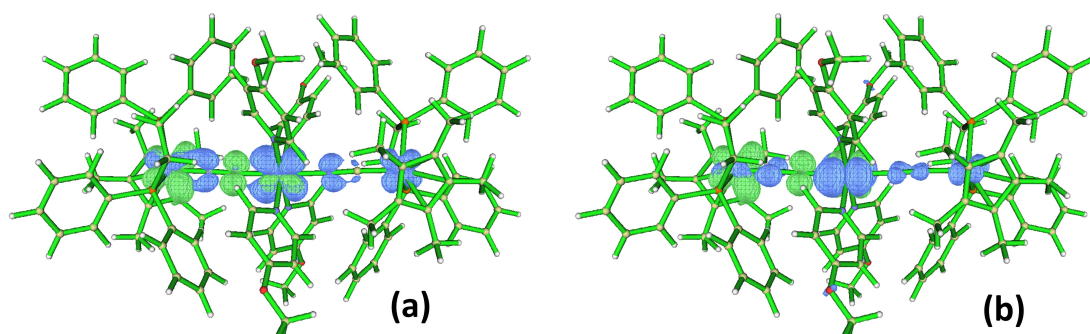

**Fig. S11.** Redistribution of the electron density for the electronic transition of  $2^{3+}$  in the calculated 1695 nm **(a)** and the calculated 1408 nm **(b)** transition band. The green and blues areas represent gain and losses of density. The isosurface value is -0.0004 au.

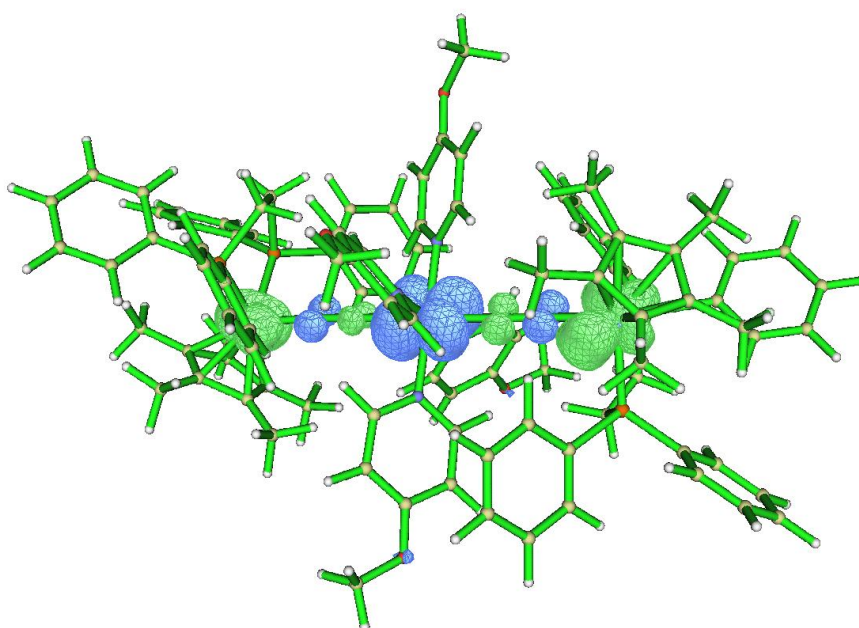

**Fig. S12.** Redistribution of the electron density for the electronic transition of  $2^{4+}$  in the calculated 733 nm transition band. The green and blues areas represent gain and losses of density. The isosurface value is -0.0004 au.

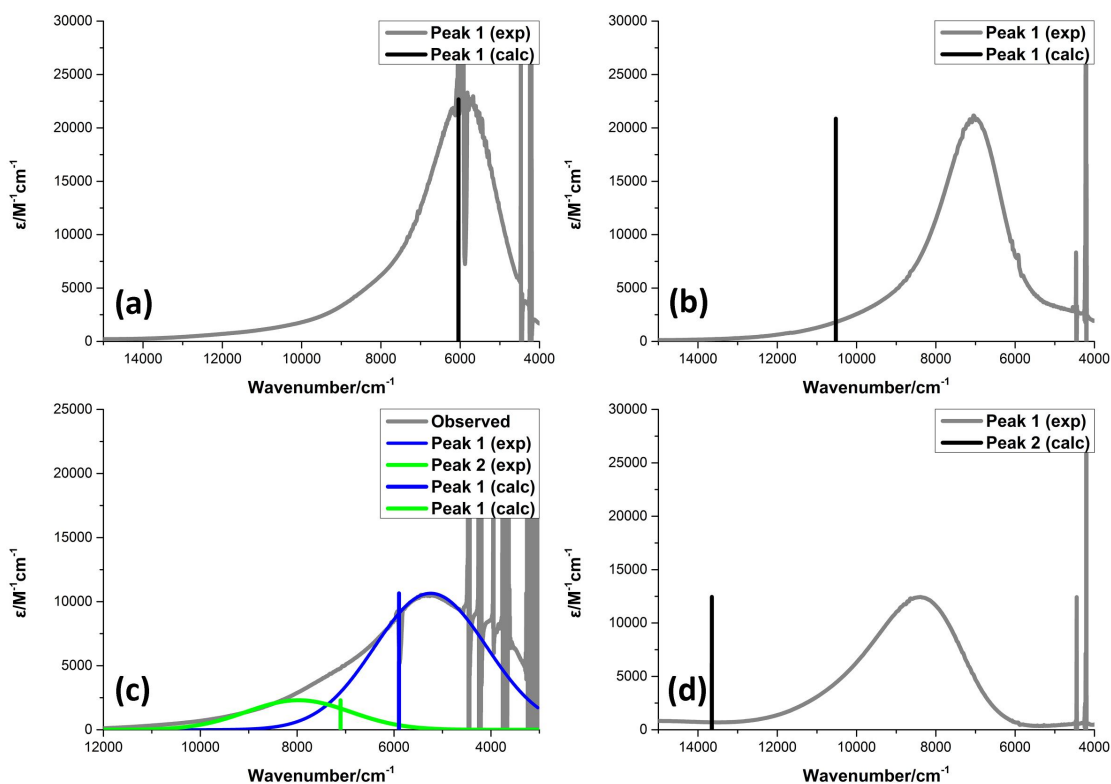

Fig. S13. The NIR spectra and calculated NIR absorption bands for  $1^{3+}$  (a),  $1^{4+}$  (b),  $2^{3+}$  (c), and  $2^{4+}$  (d).

Table S9. Calculated and experimental electronic absorption (in dichloromethane) of  $1^{3+}$ ,  $1^{4+}$ ,  $2^{3+}$ ,  $2^{4+}$ .

| Complex  | Excitation (percentage)                                         | f      | $\lambda_{\max}(\text{exp})/\text{cm}^{-1}$<br>( $\epsilon/\text{M}^{-1}\text{cm}^{-1}$ ) | $\nu_{\max}(\text{calc})$<br>/ $\text{cm}^{-1}$ | E(GS)/A.U. | E(ES)/A.U. |
|----------|-----------------------------------------------------------------|--------|-------------------------------------------------------------------------------------------|-------------------------------------------------|------------|------------|
| $1^{3+}$ | HOMO-1 (375 $\beta$ ) $\rightarrow$ LUMO (377 $\beta$ ) (23%)   | 0.398  | 5860 (22957)                                                                              | 6044                                            | -4397.427  | -4397.399  |
|          | HOMO (376 $\beta$ ) $\rightarrow$ LUMO (377 $\beta$ ) (73%)     |        |                                                                                           |                                                 |            |            |
| $1^{4+}$ | HOMO-2 (373 $\beta$ ) $\rightarrow$ LUMO (376 $\beta$ ) (55%)   | 0.1798 | 7038 (20869)                                                                              | 10524                                           | -4396.727  | -4396.679  |
|          | HOMO-1 (374 $\beta$ ) $\rightarrow$ LUMO+1 (377 $\beta$ ) (19%) |        |                                                                                           |                                                 |            |            |
| $2^{3+}$ | HOMO (416 $\beta$ ) $\rightarrow$ LUMO (417 $\beta$ ) (66%)     | 0.1891 | 5244 (10650)                                                                              | 5898                                            | -4789.934  | -4789.907  |
|          | HOMO-1 (415 $\beta$ ) $\rightarrow$ LUMO (417 $\beta$ ) (59%)   |        |                                                                                           |                                                 |            |            |
|          | HOMO-9 (407 $\beta$ ) $\rightarrow$ LUMO (417 $\beta$ ) (21%)   |        |                                                                                           |                                                 |            |            |
| $2^{4+}$ | HOMO-1 (414 $\beta$ ) $\rightarrow$ LUMO (416 $\beta$ ) (85%)   | 0.152  | 8409 (12448)                                                                              | 13652                                           | -4790.052  | -4789.990  |

Threshold of optimization: Maximum Force = 0.000450; RMS Force = 0.000300; Maximum Displacement = 0.001800; RMS Displacement = 0.001200.

#### Optimized Cartesian Coordinates of $1^{3+}$

| Atomic Name | X         | Y         | Z         |
|-------------|-----------|-----------|-----------|
| Ru          | 0.000078  | -0.248445 | -0.000203 |
| Fe          | 4.851510  | -0.150713 | 1.308524  |
| Fe          | -4.851473 | -0.151026 | -1.308378 |
| P           | 5.618481  | -1.236870 | -0.525219 |

|   |           |           |           |
|---|-----------|-----------|-----------|
| P | 5.248631  | 1.730588  | 0.107462  |
| P | -5.618045 | -1.237070 | 0.525504  |
| P | -5.248641 | 1.730398  | -0.107413 |
| O | -0.864368 | 4.236942  | 4.289446  |
| O | -0.995062 | -4.461349 | 4.524560  |
| O | 0.995466  | -4.461937 | -4.524341 |
| O | 0.862963  | 4.235949  | -4.291208 |
| N | -1.959547 | -0.230943 | -0.419462 |
| N | 0.326913  | -1.719329 | -1.469951 |
| N | -0.289458 | 1.227976  | 1.474497  |
| N | 1.959699  | -0.230618 | 0.419132  |
| N | -0.326458 | -1.718968 | 1.469966  |
| N | 0.289262  | 1.227559  | -1.475403 |
| C | 0.400166  | -3.698554 | 2.652803  |
| H | 1.138536  | -4.487580 | 2.749028  |
| C | 5.591001  | 0.679411  | 3.122093  |
| H | 5.791360  | 1.725480  | 3.312078  |
| C | -0.195677 | 2.109363  | -3.674107 |
| H | -0.722359 | 1.982731  | -4.613514 |
| C | -0.714438 | -3.609815 | 3.511355  |
| C | 0.551300  | -2.737071 | 1.654583  |
| H | 1.396138  | -2.765871 | 0.972612  |
| C | 6.518005  | -0.296665 | 2.608614  |
| H | 7.553600  | -0.131753 | 2.345675  |
| C | 7.392558  | -1.825248 | -0.463368 |
| C | 6.986965  | 2.400693  | -0.064627 |
| C | 3.120098  | -0.191556 | 0.728792  |
| C | 4.341402  | 0.029941  | 3.367833  |
| H | 3.452064  | 0.499916  | 3.763889  |
| C | 1.632673  | -2.557390 | -3.315400 |
| H | 2.496498  | -2.480301 | -3.965091 |
| C | 3.770128  | -3.372757 | -0.225059 |
| H | 3.572770  | -2.917976 | 0.745705  |
| C | -1.632311 | -2.556949 | 3.315393  |
| H | -2.496190 | -2.479843 | 3.965004  |
| C | 4.788796  | 1.230143  | -1.657598 |
| H | 3.703995  | 1.063578  | -1.636835 |
| H | 4.982372  | 2.042345  | -2.368430 |
| C | 5.831267  | -1.560508 | 2.564530  |
| H | 6.261153  | -2.497782 | 2.235692  |
| C | 1.105894  | 2.298520  | -1.247572 |
| H | 1.602725  | 2.341187  | -0.282660 |
| C | 0.714861  | -3.610342 | -3.511188 |
| C | 0.341330  | 1.150521  | 2.674068  |

|   |           |           |           |
|---|-----------|-----------|-----------|
| H | 0.981056  | 0.285985  | 2.823549  |
| C | -4.341896 | 0.030999  | -3.367725 |
| H | -3.452869 | 0.501598  | -3.763736 |
| C | 4.231245  | 3.251575  | 0.482550  |
| C | -0.550792 | -2.737514 | -1.654396 |
| H | -1.395567 | -2.766336 | -0.972348 |
| C | 4.488860  | -1.361664 | 3.020610  |
| H | 3.722002  | -2.120025 | 3.102476  |
| C | 7.687275  | -3.190430 | -0.299995 |
| H | 6.889871  | -3.930541 | -0.266939 |
| C | -8.439116 | -0.886565 | 0.504382  |
| H | -8.236074 | 0.178613  | 0.608851  |
| C | -4.231691 | 3.251541  | -0.483083 |
| C | 7.737669  | 2.647034  | 1.099070  |
| H | 7.309384  | 2.462905  | 2.080649  |
| C | 0.644094  | 3.215928  | -3.429769 |
| C | 1.413785  | -1.649862 | -2.295131 |
| H | 2.105371  | -0.835626 | -2.107895 |
| C | -6.987060 | 2.400063  | 0.065561  |
| C | 8.439402  | -0.886065 | -0.502779 |
| H | 8.236163  | 0.179144  | -0.606600 |
| C | 4.698250  | -2.763053 | -1.081146 |
| C | -1.413404 | -1.649501 | 2.295056  |
| H | -2.105044 | -0.835334 | 2.107710  |
| C | -5.542724 | -0.052857 | 2.025635  |
| H | -6.575715 | 0.161144  | 2.325153  |
| H | -5.055603 | -0.576926 | 2.855835  |
| C | -1.106126 | 2.298810  | 1.246167  |
| H | -1.602644 | 2.341224  | 0.281090  |
| C | 3.129071  | -4.559990 | -0.610869 |
| H | 2.423424  | -5.044089 | 0.060205  |
| C | -5.591763 | 0.679714  | -3.121391 |
| H | -5.792628 | 1.725801  | -3.310751 |
| C | 4.994640  | -3.353549 | -2.323817 |
| H | 5.749959  | -2.915584 | -2.974747 |
| C | -4.488578 | -1.360861 | -3.021193 |
| H | -3.721336 | -2.118794 | -3.103475 |
| C | -0.341853 | 1.149725  | -2.674788 |
| H | -0.981507 | 0.285070  | -2.823900 |
| C | -3.120007 | -0.191974 | -0.728914 |
| C | 3.236943  | 3.207852  | 1.473649  |
| H | 3.058922  | 2.279026  | 2.016060  |
| C | 0.194741  | 2.110369  | 3.673126  |
| H | 0.721181  | 1.984020  | 4.612707  |

|   |            |           |           |
|---|------------|-----------|-----------|
| C | 1.307910   | 3.295321  | -2.187652 |
| H | 1.958428   | 4.137347  | -1.977038 |
| C | -0.212562  | 4.246642  | 5.591676  |
| H | -0.523746  | 3.380612  | 6.186157  |
| H | -0.545680  | 5.163286  | 6.073322  |
| H | 0.878080   | 4.263083  | 5.476759  |
| C | 4.351602   | -4.536034 | -2.711138 |
| H | 4.588654   | -4.994294 | -3.665762 |
| C | -0.645086  | 3.216780  | 3.428287  |
| C | -1.308517  | 3.295818  | 2.185940  |
| H | -1.959031  | 4.137745  | 1.974916  |
| C | 10.062312  | -2.676791 | -0.247376 |
| H | 11.093001  | -3.006403 | -0.170262 |
| C | -10.061763 | -2.677434 | 0.248271  |
| H | -11.092416 | -3.007177 | 0.171237  |
| C | -9.768881  | -1.314524 | 0.403852  |
| H | -10.572054 | -0.585453 | 0.446209  |
| C | -0.399680  | -3.699074 | -2.652550 |
| H | -1.138007  | -4.488158 | -2.748642 |
| C | 5.543651   | -0.052762 | -2.025439 |
| H | 6.576753   | 0.161171  | -2.324629 |
| H | 5.056776   | -0.576862 | -2.855762 |
| C | -6.518173  | -0.297095 | -2.608186 |
| H | -7.553797  | -0.132831 | -2.344947 |
| C | 3.418460   | -5.140349 | -1.853417 |
| H | 2.937465   | -6.068332 | -2.148472 |
| C | -7.392103  | -1.825525 | 0.464038  |
| C | -4.697758  | -2.763264 | 1.081247  |
| C | 9.020012   | -3.612132 | -0.193682 |
| H | 9.242651   | -4.667374 | -0.074113 |
| C | -4.482751  | 4.452017  | 0.206325  |
| H | -5.282152  | 4.505989  | 0.943362  |
| C | 9.769224   | -1.313834 | -0.402151 |
| H | 10.572259  | -0.584568 | -0.443781 |
| C | 3.726375   | 5.596579  | 0.079696  |
| H | 3.930795   | 6.524742  | -0.443934 |
| C | -3.237464  | 3.207830  | -1.474257 |
| H | -3.059289  | 2.278943  | -2.016509 |
| C | -3.769880  | -3.373067 | 0.224977  |
| H | -3.572713  | -2.918324 | -0.745854 |
| C | -5.830783  | -1.560607 | -2.564869 |
| H | -6.260179  | -2.498261 | -2.236482 |
| C | 2.725440   | 5.549118  | 1.063107  |
| H | 2.154356   | 6.441716  | 1.297255  |

|   |            |           |           |
|---|------------|-----------|-----------|
| C | 4.482149   | 4.451958  | -0.207064 |
| H | 5.281662   | 4.505943  | -0.943982 |
| C | -3.418054  | -5.140655 | 1.853309  |
| H | -2.937076  | -6.068669 | 2.148289  |
| C | -7.686625  | -3.190658 | 0.299884  |
| H | -6.889079  | -3.930598 | 0.266190  |
| C | -4.994006  | -3.353728 | 2.323972  |
| H | -5.749169  | -2.915678 | 2.975026  |
| C | -4.351017  | -4.536268 | 2.711186  |
| H | -4.587947  | -4.994500 | 3.665852  |
| C | 7.555205   | 2.683637  | -1.320008 |
| H | 6.999252   | 2.522053  | -2.240757 |
| C | -9.612389  | 3.404161  | 0.248207  |
| H | -10.623953 | 3.789588  | 0.318819  |
| C | -4.787959  | 1.230014  | 1.657474  |
| H | -3.703177  | 1.063407  | 1.636191  |
| H | -4.981176  | 2.042217  | 2.368401  |
| C | -3.727227  | 5.596733  | -0.080734 |
| H | -3.931760  | 6.524937  | 0.442778  |
| C | 9.042790   | 3.146470  | 1.009950  |
| H | 9.611579   | 3.336485  | 1.914085  |
| C | -7.738784  | 2.645490  | -1.097673 |
| H | -7.311312  | 2.460806  | -2.079495 |
| C | -3.128847  | -4.560348 | 0.610694  |
| H | -2.423388  | -5.044555 | -0.060499 |
| C | -0.104204  | -5.576503 | 4.807654  |
| H | -0.052335  | -6.256377 | 3.948958  |
| H | -0.545598  | -6.089998 | 5.659034  |
| H | 0.895781   | -5.215072 | 5.072520  |
| C | -2.485481  | 4.356564  | -1.761654 |
| H | -1.726060  | 4.328282  | -2.540167 |
| C | 2.484696   | 4.356495  | 1.760741  |
| H | 1.725209   | 4.328215  | 2.539193  |
| C | -2.726391  | 5.549283  | -1.064238 |
| H | -2.155491  | 6.441937  | -1.298621 |
| C | 0.210784   | 4.245260  | -5.593256 |
| H | -0.879829  | 4.261544  | -5.478033 |
| H | 0.521949   | 3.379157  | -6.187638 |
| H | 0.543617   | 5.161854  | -6.075196 |
| C | -9.019310  | -3.612551 | 0.193689  |
| H | -9.241787  | -4.667761 | 0.073538  |
| C | -9.043958  | 3.144662  | -1.007801 |
| H | -9.613524  | 3.333973  | -1.911594 |
| C | 0.104699   | -5.577215 | -4.807240 |

|   |           |           |           |
|---|-----------|-----------|-----------|
| H | 0.546096  | -6.090777 | -5.658578 |
| H | -0.895336 | -5.215917 | -5.072094 |
| H | 0.052950  | -6.256976 | -3.948447 |
| C | -8.863155 | 3.178702  | 1.411170  |
| H | -9.292573 | 3.392137  | 2.384542  |
| C | 8.863946  | 3.178976  | -1.409193 |
| H | 9.294103  | 3.391914  | -2.382348 |
| C | -7.554363 | 2.683648  | 1.321228  |
| H | -6.997612 | 2.522801  | 2.241621  |
| C | 9.612179  | 3.405328  | -0.245761 |
| H | 10.623707 | 3.790958  | -0.315787 |

Optimized Cartesian Coordinates of **1<sup>4+</sup>**

| Atomic Name | X         | Y         | Z         |
|-------------|-----------|-----------|-----------|
| Ru          | -0.011262 | -0.284590 | -0.020575 |
| Fe          | -4.972901 | -0.398291 | 1.216885  |
| Fe          | 4.935386  | -0.395157 | -1.292323 |
| P           | -5.766650 | -0.984230 | -0.903822 |
| P           | 5.572496  | -1.144352 | 0.813297  |
| P           | -5.388311 | 1.758766  | 0.517267  |
| P           | 5.566687  | 1.668998  | -0.473236 |
| N           | 1.965918  | -0.304678 | -0.436959 |
| O           | 0.138196  | -6.524965 | -0.567244 |
| O           | -1.512513 | 0.306025  | -6.084278 |
| O           | 1.410761  | -0.981675 | 6.052111  |
| N           | -0.055192 | -2.382408 | -0.204447 |
| N           | 0.431296  | -0.492023 | 2.031235  |
| N           | -0.460575 | -0.080694 | -2.070710 |
| C           | 3.123337  | -0.334691 | -0.714116 |
| N           | -1.997800 | -0.299168 | 0.387343  |
| C           | 4.665454  | 4.344796  | -0.412547 |
| H           | 5.516199  | 4.521559  | 0.243839  |
| C           | 1.752384  | -1.493227 | 3.790374  |
| H           | 2.541791  | -2.171958 | 4.094933  |
| C           | -0.019398 | 0.923304  | -4.232864 |
| H           | 0.595363  | 1.598457  | -4.818624 |
| C           | 3.872951  | -3.424373 | 0.608111  |
| H           | 3.601147  | -3.041938 | -0.375046 |
| C           | -5.059054 | -2.495345 | -3.177615 |
| H           | -5.785658 | -1.878864 | -3.704525 |
| C           | 0.019468  | -5.190151 | -0.391134 |
| C           | 8.642420  | 3.600217  | -2.471274 |
| H           | 8.733946  | 4.326480  | -3.271836 |
| C           | -3.759285 | 5.391391  | 1.640829  |

|   |           |           |           |
|---|-----------|-----------|-----------|
| H | -3.926826 | 6.437702  | 1.409265  |
| C | 0.005396  | 0.090359  | 4.345302  |
| H | -0.577792 | 0.675503  | 5.048322  |
| C | 4.773257  | -2.712738 | 1.417478  |
| C | 5.137558  | -3.214426 | 2.681784  |
| H | 5.870105  | -2.694021 | 3.296387  |
| C | -4.411907 | -3.529547 | -3.865671 |
| H | -4.621172 | -3.690975 | -4.917940 |
| C | 4.617657  | -1.905042 | -2.841470 |
| H | 3.800435  | -2.612372 | -2.869598 |
| C | 5.886623  | -2.116050 | -2.221925 |
| H | 6.194376  | -3.031771 | -1.735408 |
| C | -1.860102 | -0.626493 | -3.962722 |
| H | -2.692176 | -1.184376 | -4.379274 |
| C | 3.851835  | 5.419582  | -0.793135 |
| H | 4.076203  | 6.417893  | -0.430135 |
| C | 7.371730  | 3.195785  | -2.041231 |
| H | 6.488709  | 3.622918  | -2.513330 |
| C | -4.328752 | 3.050238  | 1.334882  |
| C | 2.526858  | 3.932052  | -2.184910 |
| H | 1.708091  | 3.781418  | -2.883891 |
| C | 1.036054  | -0.774181 | 4.772371  |
| C | -3.921565 | -3.146335 | -1.124949 |
| H | -3.731996 | -2.998047 | -0.063171 |
| C | 0.615663  | -4.381000 | -1.383037 |
| H | 1.102516  | -4.856303 | -2.227207 |
| C | -7.726553 | 2.978881  | -0.587716 |
| H | -7.212975 | 3.001728  | -1.546252 |
| C | 0.560634  | -3.003609 | -1.254455 |
| H | 1.009137  | -2.351805 | -1.997104 |
| C | -6.725523 | -0.838304 | 2.349756  |
| H | -7.728952 | -0.501435 | 2.128663  |
| C | -1.109940 | 0.229133  | -4.798795 |
| C | -0.255382 | 0.197566  | 2.979655  |
| H | -1.028984 | 0.865196  | 2.610702  |
| C | 3.345893  | 2.855536  | -1.814863 |
| H | 3.168397  | 1.862215  | -2.225624 |
| C | -5.679343 | 0.574701  | -1.996441 |
| H | -5.191461 | 0.293650  | -2.936043 |
| H | -6.712833 | 0.860087  | -2.224303 |
| C | -4.806389 | -2.296284 | -1.805725 |
| C | 1.425904  | -1.330851 | 2.454701  |
| H | 1.957292  | -1.884179 | 1.685471  |
| C | 0.261006  | 0.738487  | -2.879772 |



|   |            |           |           |
|---|------------|-----------|-----------|
| H | 1.082330   | 1.267881  | -2.405098 |
| C | -0.646485  | -3.165975 | 0.733946  |
| H | -1.128447  | -2.645876 | 1.556482  |
| C | -4.914908  | 1.704835  | -1.304382 |
| H | -5.095778  | 2.674576  | -1.783312 |
| H | -3.835029  | 1.513168  | -1.325238 |
| C | -5.748683  | -0.159176 | 3.165180  |
| H | -5.881987  | 0.781140  | 3.682300  |
| C | 4.585641   | -4.418197 | 3.138639  |
| H | 4.876273   | -4.812039 | 4.106777  |
| C | -2.577575  | 3.675996  | 2.895610  |
| H | -1.834935  | 3.400502  | 3.640244  |
| C | -0.633855  | -4.559555 | 0.686965  |
| H | -1.107446  | -5.124820 | 1.481867  |
| C | -8.577992  | -0.641337 | -0.765805 |
| H | -8.371835  | 0.406542  | -0.549575 |
| C | 10.086925  | -1.722489 | 1.894681  |
| H | 11.131435  | -1.870520 | 2.146508  |
| C | 9.672205   | 2.139841  | -0.826805 |
| H | 10.560513  | 1.734042  | -0.353699 |
| C | -3.350212  | 2.685924  | 2.273431  |
| H | -3.207571  | 1.635855  | 2.528216  |
| C | 7.376553   | -1.340068 | 1.242242  |
| C | -3.521477  | -4.375949 | -3.185093 |
| H | -3.037720  | -5.189786 | -3.715055 |
| C | -3.282087  | -4.185500 | -1.816973 |
| H | -2.614619  | -4.858243 | -1.284675 |
| C | -6.159103  | -2.100533 | 1.951274  |
| H | -6.654039  | -2.846346 | 1.342545  |
| C | 5.886419   | 0.018589  | -3.150357 |
| H | 6.212685   | 0.997075  | -3.476552 |
| C | 3.689851   | -5.132544 | 2.327318  |
| H | 3.294036   | -6.082930 | 2.670503  |
| C | 3.337692   | -4.637878 | 1.063202  |
| H | 2.677338   | -5.212575 | 0.419184  |
| C | -9.713447  | 3.505404  | 0.709653  |
| H | -10.716018 | 3.915243  | 0.766674  |
| C | -3.160467  | -0.342582 | 0.638733  |
| C | 9.793004   | 3.074989  | -1.865340 |
| H | 10.774949  | 3.394094  | -2.197527 |
| C | -0.793410  | 1.141867  | -7.038422 |
| H | -0.834023  | 2.194037  | -6.735617 |
| H | -1.314058  | 1.010474  | -7.984208 |
| H | 0.244375   | 0.804963  | -7.137624 |

|   |           |           |           |
|---|-----------|-----------|-----------|
| C | -4.832833 | -2.184450 | 2.474050  |
| H | -4.147446 | -3.008836 | 2.336917  |
| C | 9.530274  | -2.381303 | 0.787915  |
| H | 10.142229 | -3.045743 | 0.187415  |
| C | -7.801808 | 2.468465  | 1.790009  |
| H | -7.326074 | 2.105180  | 2.698492  |
| C | -0.463661 | -7.451181 | 0.384591  |
| H | -0.026405 | -7.318922 | 1.380904  |
| H | -0.229623 | -8.443893 | 0.006821  |
| H | -1.550908 | -7.314450 | 0.418865  |
| C | -4.540987 | 4.406175  | 1.023855  |
| H | -5.326347 | 4.699403  | 0.329070  |
| C | 7.251463  | 2.263947  | -0.992638 |
| C | -4.577879 | -0.988965 | 3.228812  |
| H | -3.657178 | -0.754604 | 3.746177  |
| C | -2.780307 | 5.026640  | 2.577826  |
| H | -2.194910 | 5.797806  | 3.069062  |
| C | 7.932430  | -0.701108 | 2.367007  |
| H | 7.335073  | -0.059810 | 3.010860  |
| C | -1.511267 | -0.756278 | -2.629154 |
| H | -2.068625 | -1.418192 | -1.972564 |
| C | -9.167073 | -3.333244 | -1.303029 |
| H | -9.395437 | -4.372397 | -1.514441 |
| C | 4.614923  | -0.588282 | -3.414577 |
| H | 3.792513  | -0.135210 | -3.951612 |
| C | 0.722091  | -0.305871 | 7.145067  |
| H | 0.833859  | 0.780547  | 7.057298  |
| H | 1.211223  | -0.654530 | 8.051721  |
| H | -0.336572 | -0.587442 | 7.164134  |
| C | -7.115764 | 2.444431  | 0.561537  |
| C | 9.283675  | -0.891053 | 2.687921  |
| H | 9.704093  | -0.399446 | 3.558824  |
| C | 4.974210  | 0.264536  | 1.916974  |
| H | 3.880923  | 0.259003  | 1.832048  |
| H | 5.224595  | 0.063792  | 2.965677  |
| C | -9.023981 | 3.504923  | -0.511219 |
| H | -9.490222 | 3.919638  | -1.398585 |
| C | 8.181001  | -2.193410 | 0.464782  |
| H | 7.764666  | -2.738522 | -0.378348 |
| C | 4.411685  | 3.057793  | -0.925093 |
| C | 2.780662  | 5.214124  | -1.678111 |
| H | 2.164171  | 6.053082  | -1.986727 |
| C | 6.674501  | -0.916864 | -2.388412 |
| H | 7.696046  | -0.765160 | -2.067534 |

|   |            |           |           |
|---|------------|-----------|-----------|
| C | -9.909143  | -1.073363 | -0.810665 |
| H | -10.711055 | -0.362367 | -0.639749 |
| C | -7.831642  | -2.909063 | -1.263850 |
| H | -7.037551  | -3.629079 | -1.452241 |
| C | -9.096666  | 2.995212  | 1.862805  |
| H | -9.619430  | 3.017978  | 2.812953  |
| C | 5.569038   | 1.589363  | 1.428267  |
| H | 6.605019   | 1.718914  | 1.761578  |
| H | 4.990532   | 2.443513  | 1.797448  |
| C | -10.205713 | -2.418545 | -1.078603 |
| H | -11.237712 | -2.750258 | -1.115002 |
| C | 8.406061   | 1.727589  | -0.392494 |
| H | 8.341422   | 0.992958  | 0.409062  |
| C | -7.536455  | -1.558018 | -1.003974 |
| N | 0.045708   | 1.815698  | 0.178159  |
| C | -0.920176  | 2.596113  | -0.392040 |
| H | -1.676042  | 2.072821  | -0.967545 |
| C | -0.949681  | 3.973459  | -0.261547 |
| H | -1.729524  | 4.569436  | -0.721888 |
| C | 0.043269   | 4.611882  | 0.509602  |
| C | 1.053899   | 3.820560  | 1.090289  |
| H | 1.857645   | 4.252138  | 1.676785  |
| C | 1.017761   | 2.441764  | 0.891182  |
| H | 1.787466   | 1.804439  | 1.315626  |
| O | -0.064587  | 5.956779  | 0.624144  |
| C | 0.853818   | 6.688815  | 1.482562  |
| H | 0.768809   | 6.342736  | 2.519934  |
| H | 0.549060   | 7.730979  | 1.412995  |
| H | 1.886412   | 6.579707  | 1.130783  |

Optimized Cartesian Coordinates of  $2^{3+}$

| Atomic Name | X         | Y         | Z         |
|-------------|-----------|-----------|-----------|
| Ru          | -0.050930 | -0.351386 | -0.014895 |
| Fe          | 4.961331  | -0.171770 | 1.110796  |
| Fe          | -5.016028 | -0.189296 | -1.131957 |
| P           | -5.259502 | 1.906727  | -0.152915 |
| P           | -5.453744 | -1.017282 | 0.995320  |
| P           | 5.220118  | 1.870363  | 0.129158  |
| P           | 5.420834  | -1.039828 | -0.950318 |
| O           | 0.983157  | 3.825816  | -4.560848 |
| O           | -1.031052 | 3.960231  | 4.428238  |
| O           | 0.896805  | -4.554458 | -4.574717 |
| O           | -0.724247 | -4.783480 | 4.381479  |
| N           | -2.013734 | -0.314884 | -0.426809 |

|   |           |           |           |
|---|-----------|-----------|-----------|
| N | 0.246754  | 1.120684  | -1.481408 |
| N | -0.333840 | 1.106942  | 1.471730  |
| N | 1.979698  | -0.295959 | 0.402302  |
| N | 0.248242  | -1.818189 | -1.499580 |
| N | -0.280683 | -1.869172 | 1.435347  |
| C | 4.539761  | -2.619850 | -1.463252 |
| C | -3.995213 | 3.209043  | -0.590386 |
| C | 3.977766  | 3.234872  | 0.469720  |
| C | -4.584143 | -2.612734 | 1.451057  |
| C | -7.160235 | -1.313055 | 1.711030  |
| C | -6.870751 | -0.597915 | -2.167521 |
| C | 1.080059  | 2.168793  | -1.266031 |
| H | 1.527473  | 2.243730  | -0.279151 |
| C | -7.821618 | -2.525520 | 1.434019  |
| H | -7.327398 | -3.299588 | 0.852403  |
| C | -3.720231 | -3.240690 | 0.540711  |
| H | -3.531042 | -2.770054 | -0.422787 |
| C | -5.078839 | 1.705045  | 1.740132  |
| H | -4.316222 | 2.417223  | 2.076680  |
| H | -6.034134 | 2.013844  | 2.178720  |
| C | -0.076111 | 1.890189  | -3.749133 |
| H | -0.529117 | 1.767023  | -4.726682 |
| C | 8.012014  | 2.145513  | -0.126077 |
| H | 7.959747  | 1.137492  | -0.533183 |
| C | 0.100161  | 1.897865  | 3.720267  |
| H | 0.626208  | 1.740101  | 4.655614  |
| C | -7.788393 | -0.366110 | 2.539322  |
| H | -7.289624 | 0.559030  | 2.817137  |
| C | 7.142894  | -1.407117 | -1.611986 |
| C | -3.161148 | 3.049987  | -1.706150 |
| H | -3.195705 | 2.124222  | -2.275775 |
| C | 1.379221  | 3.111268  | -2.249224 |
| H | 2.045571  | 3.927617  | -1.995255 |
| C | -0.564267 | -2.897617 | -1.618139 |
| H | -1.361335 | -2.975891 | -0.883726 |
| C | -0.325371 | 1.002997  | -2.715838 |
| H | -0.982142 | 0.149792  | -2.852745 |
| C | -0.411162 | -3.864377 | -2.612547 |
| H | -1.093881 | -4.707474 | -2.643896 |
| C | -6.875087 | 2.842014  | -0.301527 |
| C | 3.651798  | -3.242959 | -0.573810 |
| H | 3.459015  | -2.768426 | 0.387732  |
| C | -9.101671 | -2.768037 | 1.945404  |
| H | -9.598226 | -3.708482 | 1.730360  |

|   |           |           |           |
|---|-----------|-----------|-----------|
| C | 7.846614  | -0.481417 | -2.402089 |
| H | 7.396046  | 0.464598  | -2.693587 |
| C | 3.088649  | 3.110687  | 1.546938  |
| H | 3.086818  | 2.188614  | 2.125358  |
| C | 0.286810  | 0.996413  | 2.673841  |
| H | 0.951184  | 0.145789  | 2.784744  |
| C | 3.977525  | 4.419076  | -0.293279 |
| H | 4.692270  | 4.546158  | -1.105905 |
| C | -1.407504 | 3.114399  | 2.270237  |
| H | -2.058974 | 3.961780  | 2.086555  |
| C | 6.844359  | 2.802411  | 0.300273  |
| C | 3.148655  | -0.212209 | 0.665665  |
| C | 1.261410  | -1.685967 | -2.406844 |
| H | 1.905440  | -0.825108 | -2.273656 |
| C | 6.757702  | -0.625127 | 2.216876  |
| C | -0.768099 | 2.988036  | 3.519700  |
| C | 9.359195  | 4.042826  | 0.565342  |
| H | 10.327009 | 4.522558  | 0.667506  |
| C | 9.262338  | 2.763425  | -0.002281 |
| H | 10.155138 | 2.244193  | -0.338241 |
| C | 1.903293  | 4.941573  | -4.414097 |
| H | 2.913533  | 4.580825  | -4.182480 |
| H | 1.557749  | 5.628984  | -3.631869 |
| H | 1.903201  | 5.446638  | -5.377678 |
| C | 6.060437  | 0.436171  | 2.889834  |
| C | -4.688476 | 0.281879  | 2.142353  |
| H | -4.967707 | 0.060693  | 3.180161  |
| H | -3.604526 | 0.146630  | 2.039499  |
| C | 6.946384  | 4.080268  | 0.874346  |
| H | 6.062687  | 4.599490  | 1.236899  |
| C | -6.965362 | 4.097931  | -0.925031 |
| H | -6.082119 | 4.580581  | -1.335905 |
| C | 4.741501  | -0.028020 | 3.223749  |
| C | -1.166996 | 2.171844  | 1.282372  |
| H | -1.637055 | 2.252182  | 0.306299  |
| C | -4.830450 | -3.208786 | 2.701800  |
| H | -5.517407 | -2.744484 | 3.407030  |
| C | -8.038155 | 2.231914  | 0.201145  |
| H | -7.993443 | 1.245271  | 0.659227  |
| C | 4.642387  | -1.410052 | 2.809829  |
| C | 3.046390  | -4.461326 | -0.915106 |
| H | 2.383667  | -4.960065 | -0.209627 |
| C | -4.218514 | -4.425274 | 3.032250  |
| H | -4.412888 | -4.884412 | 3.995996  |

|   |            |           |           |
|---|------------|-----------|-----------|
| C | -6.023324  | -1.776368 | -2.168661 |
| C | 0.527555   | -2.958793 | 1.427271  |
| H | 1.274330   | -2.992909 | 0.639534  |
| C | -3.118292  | -4.463716 | 0.867746  |
| H | -2.469547  | -4.962053 | 0.149883  |
| C | -3.177632  | -0.233916 | -0.705668 |
| C | -9.276474  | 2.876984  | 0.098077  |
| H | -10.167679 | 2.399646  | 0.494079  |
| C | 4.750171   | 0.240459  | -2.188397 |
| H | 5.106131   | 0.000934  | -3.198398 |
| H | 3.661364   | 0.107143  | -2.167615 |
| C | -0.518492  | -3.875246 | 3.395661  |
| C | -3.932528  | 4.397669  | 0.162721  |
| H | -4.600657  | 4.551829  | 1.009004  |
| C | -1.350996  | -2.737473 | 3.418854  |
| H | -2.088769  | -2.635041 | 4.205729  |
| C | -3.368420  | -5.057594 | 2.112510  |
| H | -2.917527  | -6.013168 | 2.363999  |
| C | 4.191940   | -4.428327 | -3.055600 |
| H | 4.405489   | -4.888815 | -4.014825 |
| C | -0.382784  | 3.926487  | 5.730592  |
| H | 0.707414   | 3.978055  | 5.620434  |
| H | -0.668723  | 3.024321  | 6.282844  |
| H | -0.741799  | 4.809263  | 6.255311  |
| C | 0.624855   | -3.705184 | -3.553584 |
| C | 1.465400   | -2.579869 | -3.441969 |
| H | 2.270505   | -2.443335 | -4.154122 |
| C | 5.107771   | 1.672080  | -1.780101 |
| H | 4.351384   | 2.377164  | -2.147713 |
| H | 6.077197   | 1.984638  | -2.185364 |
| C | 0.438561   | -3.983440 | 2.369811  |
| H | 1.120895   | -4.824255 | 2.303605  |
| C | -9.070463  | -0.610808 | 3.052099  |
| H | -9.540984  | 0.124767  | 3.696428  |
| C | -6.183402  | 0.432798  | -2.905725 |
| C | 8.199526   | 4.696091  | 1.005227  |
| H | 8.269471   | 5.682138  | 1.453167  |
| C | 4.805924   | -3.217298 | -2.708460 |
| H | 5.516115   | -2.758647 | -3.394374 |
| C | 2.210385   | 4.158569  | 1.863626  |
| H | 1.547186   | 4.069304  | 2.720717  |
| C | 0.795733   | 2.975478  | -3.520556 |
| C | 5.881736   | -1.780232 | 2.200161  |
| C | -1.214148  | -1.781665 | 2.428622  |

|   |            |           |           |
|---|------------|-----------|-----------|
| H | -1.848895  | -0.902901 | 2.411766  |
| C | 2.206341   | 5.332412  | 1.097818  |
| H | 1.538627   | 6.148818  | 1.354951  |
| C | -3.035045  | 5.411505  | -0.195629 |
| H | -2.999944  | 6.329523  | 0.382268  |
| C | -4.805878  | -1.445910 | -2.856214 |
| C | -8.207365  | 4.739631  | -1.031659 |
| H | -8.270797  | 5.709911  | -1.513055 |
| C | -9.363677  | 4.133471  | -0.520656 |
| H | -10.322440 | 4.634275  | -0.603560 |
| C | 0.084431   | -5.744144 | -4.759639 |
| H | 0.502008   | -6.249154 | -5.628170 |
| H | 0.149963   | -6.398915 | -3.881908 |
| H | -0.959933  | -5.474735 | -4.956628 |
| C | -4.898828  | -0.078724 | -3.301013 |
| C | 3.092551   | 5.461183  | 0.015301  |
| H | 3.116591   | 6.380701  | -0.562415 |
| C | 3.762133   | 0.671093  | 4.110490  |
| H | 3.900292   | 1.758878  | 4.103632  |
| H | 3.887071   | 0.336519  | 5.149734  |
| H | 2.727335   | 0.449568  | 3.818769  |
| C | -8.292445  | -0.562983 | -1.708764 |
| H | -8.422190  | -1.018043 | -0.718161 |
| H | -8.927595  | -1.120422 | -2.409717 |
| H | -8.678715  | 0.459659  | -1.659763 |
| C | -9.735349  | -1.805487 | 2.745863  |
| H | -10.727086 | -1.994323 | 3.142707  |
| C | 3.317343   | -5.055706 | -2.155277 |
| H | 2.868663   | -6.010424 | -2.415698 |
| C | -6.447026  | -3.152289 | -1.765948 |
| H | -5.733719  | -3.651246 | -1.098342 |
| H | -6.544131  | -3.778813 | -2.661887 |
| H | -7.426806  | -3.135687 | -1.280242 |
| C | 7.749744   | -2.641175 | -1.309321 |
| H | 7.204431   | -3.397298 | -0.749903 |
| C | -2.276134  | 4.073931  | -2.075222 |
| H | -1.659294  | 3.958743  | -2.962378 |
| C | -3.699950  | -2.387686 | -3.197516 |
| H | -2.714056  | -1.920018 | -3.078797 |
| H | -3.788907  | -2.708707 | -4.244101 |
| H | -3.729175  | -3.291174 | -2.576085 |
| C | 6.632140   | 1.745819  | 3.327231  |
| H | 7.534461   | 2.017261  | 2.770514  |
| H | 6.906202   | 1.682588  | 4.388646  |

|   |           |           |           |
|---|-----------|-----------|-----------|
| H | 5.915908  | 2.571116  | 3.223415  |
| C | 9.144801  | -0.767259 | -2.850416 |
| H | 9.673428  | -0.043902 | -3.463171 |
| C | -2.208053 | 5.251868  | -1.319219 |
| H | -1.531938 | 6.049163  | -1.612086 |
| C | -6.748117 | 1.741898  | -3.345169 |
| H | -7.603292 | 2.055727  | -2.739546 |
| H | -7.095976 | 1.648460  | -4.382463 |
| H | -6.005052 | 2.548502  | -3.324339 |
| C | 8.201641  | -0.636493 | 1.823833  |
| H | 8.363742  | -1.097012 | 0.839824  |
| H | 8.790855  | -1.208560 | 2.552888  |
| H | 8.618807  | 0.375023  | 1.789337  |
| C | 3.508368  | -2.327540 | 3.131486  |
| H | 2.533400  | -1.857759 | 2.939602  |
| H | 3.535329  | -2.612174 | 4.192536  |
| H | 3.560650  | -3.253955 | 2.544348  |
| C | 0.118251  | -5.965830 | 4.458241  |
| H | 1.169000  | -5.684085 | 4.592744  |
| H | 0.001177  | -6.584149 | 3.559808  |
| H | -0.229194 | -6.514001 | 5.331460  |
| C | 9.752366  | -1.985001 | -2.518187 |
| H | 10.756862 | -2.205763 | -2.863472 |
| C | -3.921284 | 0.590862  | -4.209238 |
| H | -4.063561 | 1.675797  | -4.248860 |
| H | -4.047974 | 0.212771  | -5.232604 |
| H | -2.884996 | 0.383660  | -3.914264 |
| C | 6.290509  | -3.172273 | 1.831665  |
| H | 5.601005  | -3.658720 | 1.129886  |
| H | 6.327569  | -3.795042 | 2.734985  |
| H | 7.293801  | -3.183471 | 1.395082  |
| C | 9.045322  | -2.926883 | -1.755897 |
| H | 9.498472  | -3.883648 | -1.517137 |

Optimized Cartesian Coordinates of  $2^{4+}$

| Atomic Name | X         | Y         | Z         |
|-------------|-----------|-----------|-----------|
| Ru          | -0.008068 | -0.241994 | 0.009179  |
| Fe          | 5.062706  | -0.302694 | 1.077841  |
| Fe          | -5.070747 | -0.255883 | -1.114724 |
| P           | -5.365397 | 1.884069  | -0.135301 |
| P           | -5.580165 | -1.081563 | 1.029995  |
| P           | 5.366208  | 1.842059  | 0.115912  |
| P           | 5.536538  | -1.111276 | -1.082855 |
| O           | 0.827902  | 3.994686  | -4.536154 |



|   |           |           |           |
|---|-----------|-----------|-----------|
| O | -1.090326 | 3.999422  | 4.501027  |
| O | 0.897676  | -4.540063 | -4.479371 |
| O | -0.968072 | -4.571295 | 4.454939  |
| N | -2.026270 | -0.205086 | -0.401526 |
| N | 0.269857  | 1.233861  | -1.464273 |
| N | -0.283113 | 1.217041  | 1.501897  |
| N | 2.009106  | -0.222881 | 0.410795  |
| N | 0.257091  | -1.728046 | -1.467567 |
| N | -0.290023 | -1.737852 | 1.471696  |
| C | 4.603224  | -2.672433 | -1.510811 |
| C | -4.089632 | 3.193985  | -0.506086 |
| C | 4.113623  | 3.168118  | 0.512641  |
| C | -4.657335 | -2.647973 | 1.462978  |
| C | -7.301825 | -1.435732 | 1.655396  |
| C | -6.921880 | -0.631967 | -2.222826 |
| C | 1.085101  | 2.300911  | -1.266367 |
| H | 1.549408  | 2.379958  | -0.287051 |
| C | -7.897228 | -2.677709 | 1.357627  |
| H | -7.341768 | -3.441677 | 0.818718  |
| C | -3.752427 | -3.218637 | 0.553585  |
| H | -3.558010 | -2.723560 | -0.397146 |
| C | -5.280609 | 1.653764  | 1.761298  |
| H | -4.555629 | 2.381534  | 2.143312  |
| H | -6.265284 | 1.939411  | 2.147228  |
| C | -0.135493 | 2.020197  | -3.715209 |
| H | -0.614190 | 1.897964  | -4.680644 |
| C | 8.154682  | 2.105995  | -0.189288 |
| H | 8.097357  | 1.126924  | -0.663455 |
| C | 0.096286  | 1.973170  | 3.776009  |
| H | 0.594104  | 1.799054  | 4.724031  |
| C | -8.012204 | -0.498518 | 2.427397  |
| H | -7.565361 | 0.449150  | 2.718879  |
| C | 7.245144  | -1.461557 | -1.745384 |
| C | -3.233018 | 3.066051  | -1.608987 |
| H | -3.241311 | 2.150290  | -2.195150 |
| C | 1.333227  | 3.263445  | -2.246492 |
| H | 1.985851  | 4.096217  | -2.006777 |
| C | -0.536768 | -2.826669 | -1.540467 |
| H | -1.315935 | -2.902654 | -0.786174 |
| C | -0.332192 | 1.115954  | -2.686176 |
| H | -0.973592 | 0.250065  | -2.815079 |
| C | -0.387237 | -3.817333 | -2.512628 |
| H | -1.056294 | -4.671845 | -2.508944 |
| C | -6.977871 | 2.806344  | -0.347888 |

|   |           |           |           |
|---|-----------|-----------|-----------|
| C | 3.703915  | -3.240325 | -0.594084 |
| H | 3.520385  | -2.745889 | 0.359159  |
| C | -9.194981 | -2.961742 | 1.798415  |
| H | -9.642599 | -3.923747 | 1.572264  |
| C | 7.930935  | -0.531430 | -2.547613 |
| H | 7.473858  | 0.411922  | -2.837539 |
| C | 3.230965  | 3.025313  | 1.592731  |
| H | 3.214985  | 2.096311  | 2.157633  |
| C | 0.314070  | 1.094315  | 2.716056  |
| H | 0.973394  | 0.239268  | 2.833092  |
| C | 4.117149  | 4.365389  | -0.230679 |
| H | 4.826261  | 4.507705  | -1.045080 |
| C | -1.394995 | 3.199310  | 2.316751  |
| H | -2.062059 | 4.035693  | 2.138943  |
| C | 6.997453  | 2.736250  | 0.304066  |
| C | 3.173224  | -0.193114 | 0.663886  |
| C | 1.239174  | -1.599356 | -2.409808 |
| H | 1.852265  | -0.708608 | -2.333048 |
| C | 6.922838  | -0.710807 | 2.162913  |
| C | -0.783315 | 3.057466  | 3.579545  |
| C | 9.507361  | 3.972847  | 0.573290  |
| H | 10.474609 | 4.453356  | 0.673863  |
| C | 9.403999  | 2.724622  | -0.060619 |
| H | 10.291503 | 2.235991  | -0.450571 |
| C | 1.686250  | 5.163096  | -4.416087 |
| H | 2.725821  | 4.861116  | -4.241163 |
| H | 1.336064  | 5.818977  | -3.609751 |
| H | 1.608481  | 5.678240  | -5.371006 |
| C | 6.270065  | 0.351561  | 2.887514  |
| C | -4.884406 | 0.240003  | 2.188900  |
| H | -5.205546 | 0.025944  | 3.216168  |
| H | -3.795612 | 0.117597  | 2.137229  |
| C | 7.103253  | 3.982904  | 0.944570  |
| H | 6.224562  | 4.480195  | 1.347938  |
| C | -7.046466 | 4.061165  | -0.977160 |
| H | -6.150160 | 4.545817  | -1.356343 |
| C | 4.953428  | -0.097140 | 3.254388  |
| C | -1.126497 | 2.276569  | 1.317479  |
| H | -1.588821 | 2.364052  | 0.338059  |
| C | -4.904421 | -3.282447 | 2.694781  |
| H | -5.623475 | -2.863230 | 3.396090  |
| C | -8.156873 | 2.193358  | 0.114526  |
| H | -8.127759 | 1.208667  | 0.579397  |
| C | 4.812703  | -1.467903 | 2.824298  |

|   |            |           |           |
|---|------------|-----------|-----------|
| C | 3.051723   | -4.442052 | -0.901714 |
| H | 2.378312   | -4.899045 | -0.179302 |
| C | -4.249162  | -4.480346 | 3.009257  |
| H | -4.442606  | -4.969691 | 3.957915  |
| C | -6.048038  | -1.788383 | -2.221399 |
| C | 0.500930   | -2.838477 | 1.544653  |
| H | 1.286468   | -2.910569 | 0.796596  |
| C | -3.108664  | -4.424084 | 0.864979  |
| H | -2.431377  | -4.883286 | 0.147600  |
| C | -3.185678  | -0.164736 | -0.673092 |
| C | -9.391268  | 2.836990  | -0.033919 |
| H | -10.295984 | 2.361676  | 0.332225  |
| C | 4.824067   | 0.224674  | -2.214351 |
| H | 5.119608   | 0.017579  | -3.250722 |
| H | 3.736125   | 0.109766  | -2.138882 |
| C | -0.685167  | -3.693363 | 3.464418  |
| C | -4.064590  | 4.373406  | 0.263953  |
| H | -4.754062  | 4.507441  | 1.096146  |
| C | -1.501345  | -2.544632 | 3.402956  |
| H | -2.287020  | -2.412925 | 4.137706  |
| C | -3.358657  | -5.056277 | 2.090791  |
| H | -2.878083  | -6.000942 | 2.327863  |
| C | 4.172106   | -4.499561 | -3.056672 |
| H | 4.353511   | -4.987286 | -4.008493 |
| C | -0.500723  | 3.942589  | 5.832195  |
| H | 0.591734   | 4.018418  | 5.772821  |
| H | -0.795993  | 3.021461  | 6.346593  |
| H | -0.900499  | 4.804527  | 6.361692  |
| C | 0.627263   | -3.669190 | -3.479370 |
| C | 1.445293   | -2.521731 | -3.418733 |
| H | 2.219909   | -2.382749 | -4.163803 |
| C | 5.240401   | 1.631139  | -1.781870 |
| H | 4.511641   | 2.368332  | -2.138819 |
| H | 6.219463   | 1.913033  | -2.184810 |
| C | 0.339709   | -3.836090 | 2.507887  |
| H | 1.006584   | -4.692355 | 2.504495  |
| C | -9.311306  | -0.787448 | 2.869117  |
| H | -9.847315  | -0.063611 | 3.474094  |
| C | -6.249218  | 0.426719  | -2.935429 |
| C | 8.356655   | 4.597812  | 1.074750  |
| H | 8.433916   | 5.561989  | 1.565961  |
| C | 4.836255   | -3.305588 | -2.745958 |
| H | 5.550010   | -2.888098 | -3.453648 |
| C | 2.360593   | 4.071519  | 1.933100  |

|   |            |           |           |
|---|------------|-----------|-----------|
| H | 1.696739   | 3.963813  | 2.787143  |
| C | 0.710205   | 3.129862  | -3.501499 |
| C | 6.034900   | -1.856303 | 2.162536  |
| C | -1.283176  | -1.614669 | 2.403326  |
| H | -1.896954  | -0.724315 | 2.323874  |
| C | 2.362092   | 5.261084  | 1.192180  |
| H | 1.701720   | 6.076345  | 1.469241  |
| C | -3.183696  | 5.411095  | -0.067900 |
| H | -3.182855  | 6.324617  | 0.518019  |
| C | -4.814668  | -1.410223 | -2.868008 |
| C | -8.284926  | 4.701299  | -1.127037 |
| H | -8.333291  | 5.671871  | -1.609205 |
| C | -9.457537  | 4.093421  | -0.656577 |
| H | -10.413181 | 4.593394  | -0.772161 |
| C | 0.086201   | -5.737019 | -4.644095 |
| H | 0.497796   | -6.249547 | -5.510864 |
| H | 0.162013   | -6.381277 | -3.759573 |
| H | -0.959554  | -5.471037 | -4.835748 |
| C | -4.935252  | -0.036278 | -3.293493 |
| C | 3.241687   | 5.405957  | 0.106644  |
| H | 3.268981   | 6.336449  | -0.452013 |
| C | 3.992373   | 0.623338  | 4.139571  |
| H | 4.158240   | 1.705623  | 4.140724  |
| H | 4.113810   | 0.277174  | 5.174801  |
| H | 2.952240   | 0.426392  | 3.850913  |
| C | -8.347442  | -0.634511 | -1.780312 |
| H | -8.478413  | -1.110893 | -0.799727 |
| H | -8.959617  | -1.196623 | -2.497881 |
| H | -8.759375  | 0.376995  | -1.722001 |
| C | -9.910042  | -2.012472 | 2.544681  |
| H | -10.914834 | -2.234533 | 2.887381  |
| C | 3.287495   | -5.073014 | -2.131058 |
| H | 2.799625   | -6.014492 | -2.365787 |
| C | -6.448108  | -3.177036 | -1.843434 |
| H | -5.716670  | -3.680390 | -1.199075 |
| H | -6.552006  | -3.784658 | -2.751576 |
| H | -7.419398  | -3.185603 | -1.341043 |
| C | 7.851902   | -2.698726 | -1.450639 |
| H | 7.312821   | -3.457735 | -0.888578 |
| C | -2.364520  | 4.113279  | -1.950368 |
| H | -1.734501  | 4.024318  | -2.831189 |
| C | -3.677736  | -2.318276 | -3.200358 |
| H | -2.706014  | -1.831553 | -3.045154 |
| H | -3.732690  | -2.618144 | -4.255291 |

|   |           |           |           |
|---|-----------|-----------|-----------|
| H | -3.703756 | -3.236347 | -2.600650 |
| C | 6.890678  | 1.630869  | 3.329748  |
| H | 7.746647  | 1.921414  | 2.714189  |
| H | 7.256554  | 1.504477  | 4.357987  |
| H | 6.179687  | 2.465254  | 3.341526  |
| C | 9.217815  | -0.822559 | -3.022501 |
| H | 9.734772  | -0.104579 | -3.650580 |
| C | -2.335802 | 5.283894  | -1.180118 |
| H | -1.677377 | 6.102061  | -1.454984 |
| C | -6.849374 | 1.716121  | -3.376315 |
| H | -7.708856 | 2.013203  | -2.768826 |
| H | -7.204312 | 1.600651  | -4.409692 |
| H | -6.128403 | 2.541913  | -3.374911 |
| C | 8.343181  | -0.727020 | 1.704814  |
| H | 8.457828  | -1.202363 | 0.721822  |
| H | 8.957565  | -1.297119 | 2.414132  |
| H | 8.765094  | 0.280227  | 1.643771  |
| C | 3.670089  | -2.366371 | 3.163248  |
| H | 2.701645  | -1.868303 | 3.025557  |
| H | 3.736490  | -2.677748 | 4.214145  |
| H | 3.677782  | -3.278621 | 2.554230  |
| C | -0.166813 | -5.775981 | 4.613091  |
| H | 0.879105  | -5.520214 | 4.817293  |
| H | -0.239193 | -6.409291 | 3.720431  |
| H | -0.590171 | -6.295659 | 5.469885  |
| C | 9.828375  | -2.042710 | -2.701768 |
| H | 10.823380 | -2.266650 | -3.070792 |
| C | -3.958743 | 0.672809  | -4.170709 |
| H | -4.116900 | 1.755993  | -4.183830 |
| H | -4.069113 | 0.320176  | -5.204995 |
| H | -2.923333 | 0.471321  | -3.869188 |
| C | 6.413763  | -3.247268 | 1.771262  |
| H | 5.673287  | -3.734785 | 1.125110  |
| H | 6.512059  | -3.864215 | 2.673718  |
| H | 7.383322  | -3.265376 | 1.265771  |
| C | 9.137272  | -2.985079 | -1.924771 |
| H | 9.593402  | -3.943619 | -1.700984 |
